# Supplementary material for: Structural and biochemical characterization of an RNA/DNA binding motif in the N-terminal domain of RecQ4 helicases
Source: PubMed Central journal article supplement (PMC4757822; doi:10.1038/srep21501), 2016-02-18
Supplement: srep21501-s1.pdf [file srep21501-s1.pdf]

## Supplementary Figure S2

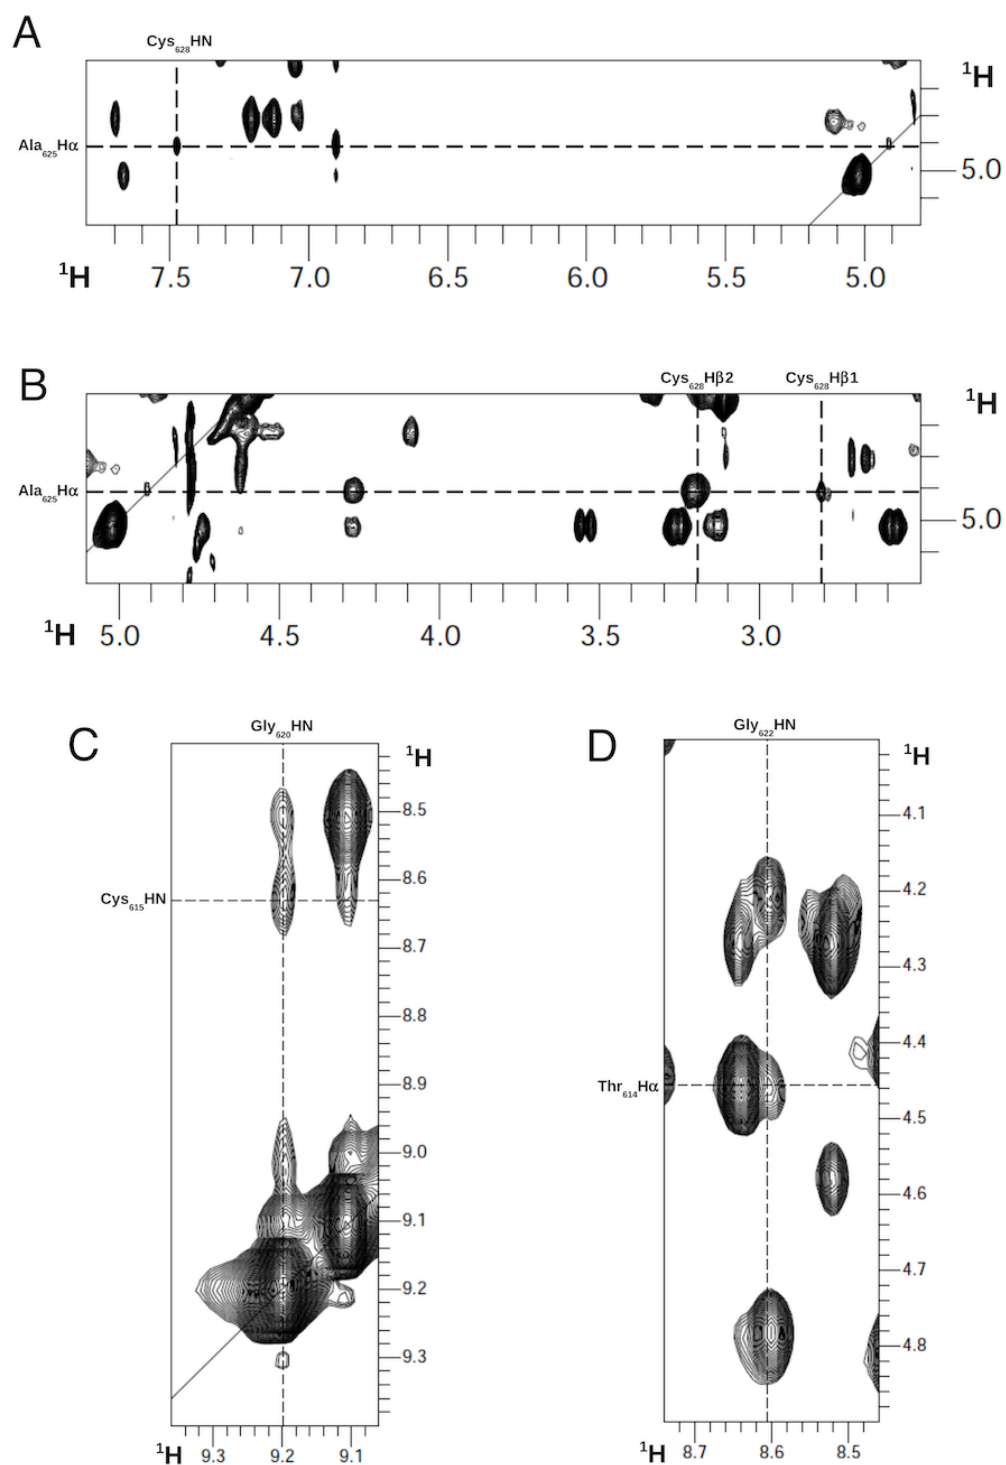

**Figure S2.**  $^1\text{H}$ -2D NOESY spectrum of pep-xZnK.

Selected regions of the  $^1\text{H}$ -2D NOESY spectrum showing the NOE cross-peaks between (A) Cys<sub>628</sub>HN and Ala<sub>625</sub>H $\alpha$ , (B) Ala<sub>625</sub>H $\alpha$ /Cys<sub>628</sub>H $\beta$ 1/H $\beta$ , (C) Gly<sub>620</sub>HN/Cys<sub>615</sub>HN, (D) Gly<sub>622</sub>HN/Thr<sub>614</sub>H $\alpha$

## Supplementary Figure S3

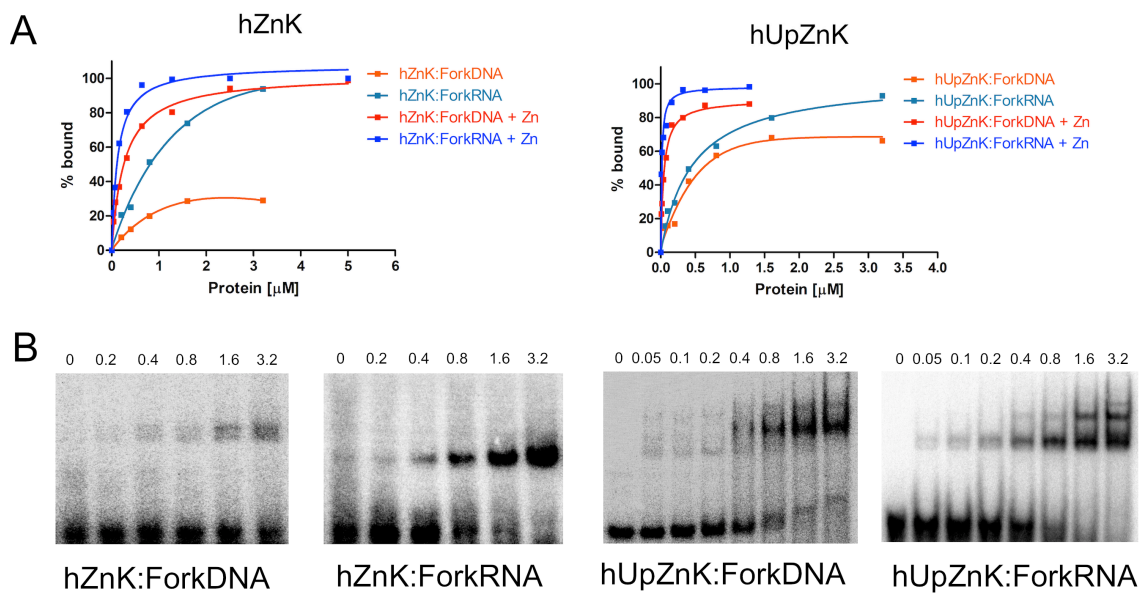

**Figure S3.** The effect of the presence of Zn<sup>2+</sup> ions in the binding buffer on the interaction between the human RecQ4 fragments and forked substrates.

(A) The plots compare the binding of forked DNA and RNA substrates in the presence of 5mM ZnCl<sub>2</sub> (red and blue curves respectively), as reported in Figure 3, and the binding in the absence of Zn<sup>2+</sup> ions in the binding buffer (orange and teal curves, respectively). (B) Example of gel shifts assays: the experiments were carried out with increasing concentrations of His-GST-tagged recombinant proteins (0-3.2  $\mu\text{M}$ ). Each experiment was repeated at least three times to plot the binding curves. Errors were very small: for the sake of clarity error bars are not shown on the plots. The proteins do bind nucleic acids also in the absence of Zn<sup>2+</sup> ions, but the presence of Zn<sup>2+</sup> in the buffer significantly improves binding to both DNA and RNA substrates, indicating that Zn<sup>2+</sup> plays a relevant role in the interaction, and suggesting that the folding of the Zn knuckle is indeed important for the interaction.

## Supplementary Figure S4

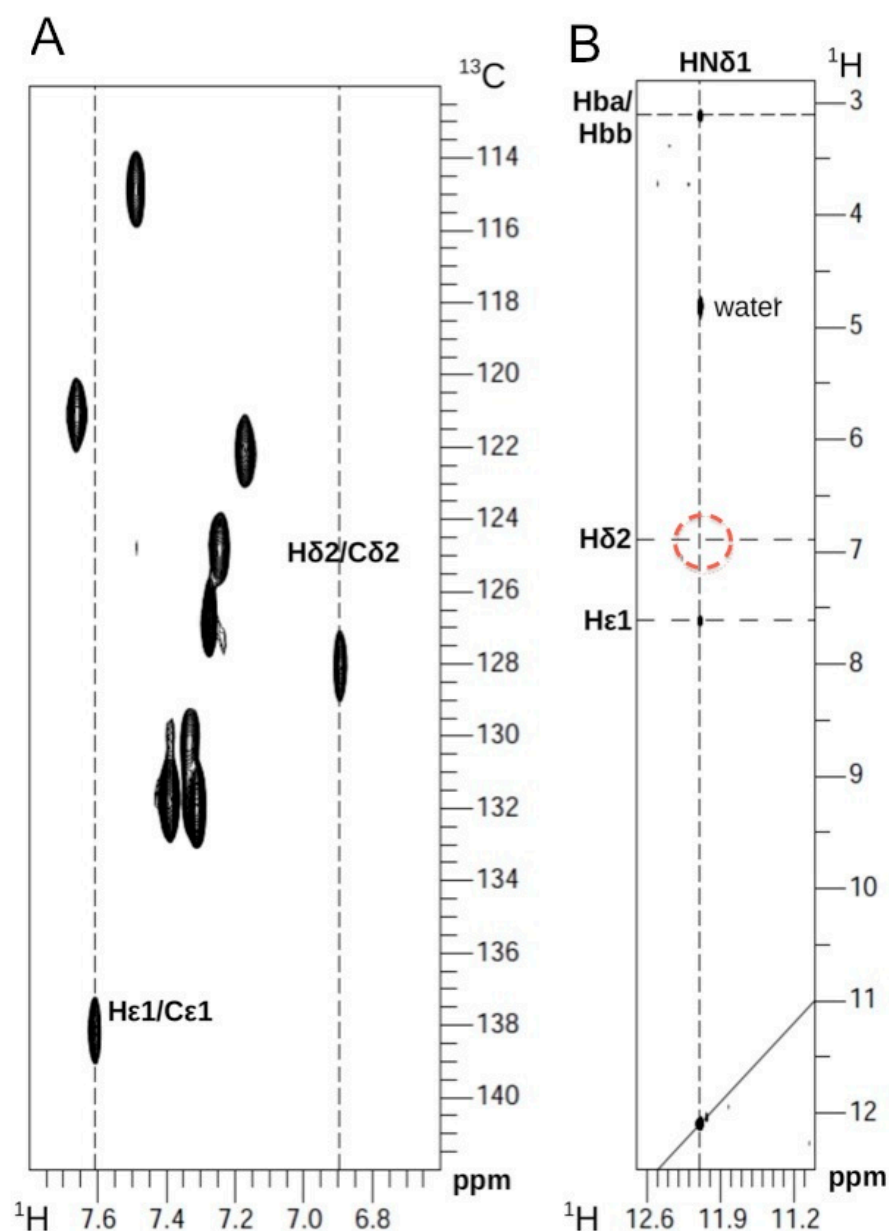

**Figure S4.**

**(A)**  $^{13}\text{C}$ -HSQC experiment (natural abundance) used to assign the aromatic resonances ( $^1\text{H}$  and  $^{13}\text{C}$ ) of His623. **(B)** Zoom on the NOESY spectrum ( $t_{\text{mix}}=100\text{ms}$ ) showing the NOEs between  $\text{HN}\delta 1$  and i. its own beta-protons ( $\text{Hba}$  and  $\text{Hbb}$  are isochronous) and ii.  $\text{H}\epsilon 2$ . The presence of these NOEs and the absence of the NOE (red dotted circle) with  $\text{H}\delta 2$  support  $\text{Zn}^{2+}$  coordination via  $\text{N}\epsilon 2$ .
